# Supplementary material
Source: PubMed Central journal article supplement (PMC5810849)

## Supplementary Materials

### Magnetolectric nanoparticles for delivery of anti-tumor peptides into glioblastoma cells across blood-brain barrier by application of magnetic fields

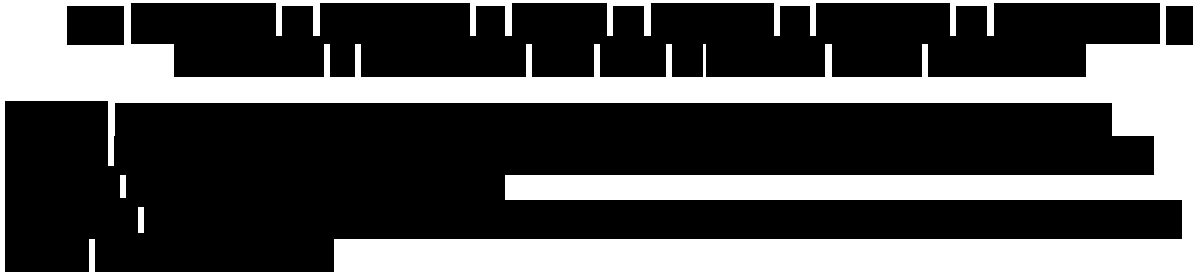

**Figure S1.** Experimental design to measure efficacy GHRH antagonist MIA690 bound to MENs drug delivery system.

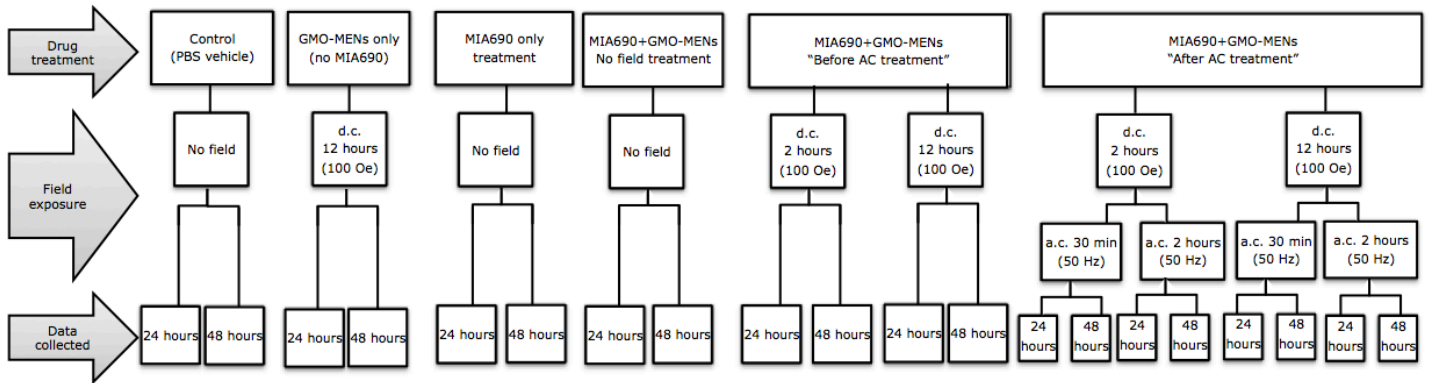

**Figure S2.** Bradford assay results are not affected by MIA690 peptide indicating that MIA690 peptide did not contribute to average cell protein content.

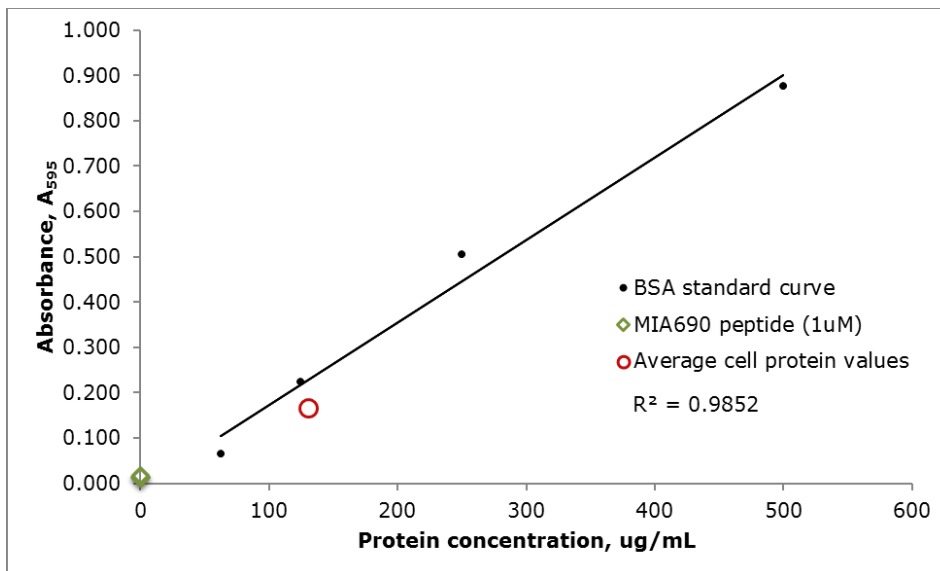

Supplement: nnm-13-423-s1.pdf [file nnm-13-423-s1.pdf]
